# Supplementary material for: IARNN-Based Semantic-Containing Double-Level Embedding Bi-LSTM for Question-and-Answer Matching
Source: Hindawi journal article supplement (doi:10.1155/2019/6074840), 2019-03-03
Supplement: f1 [file 6074840.f1.pdf]

# IARNN Based Semantic-containing Double-level Bi-LSTM for Question Answer Selection

Chang-zhu Xiong <sup>1,\*</sup>, Minglian Su <sup>2</sup>

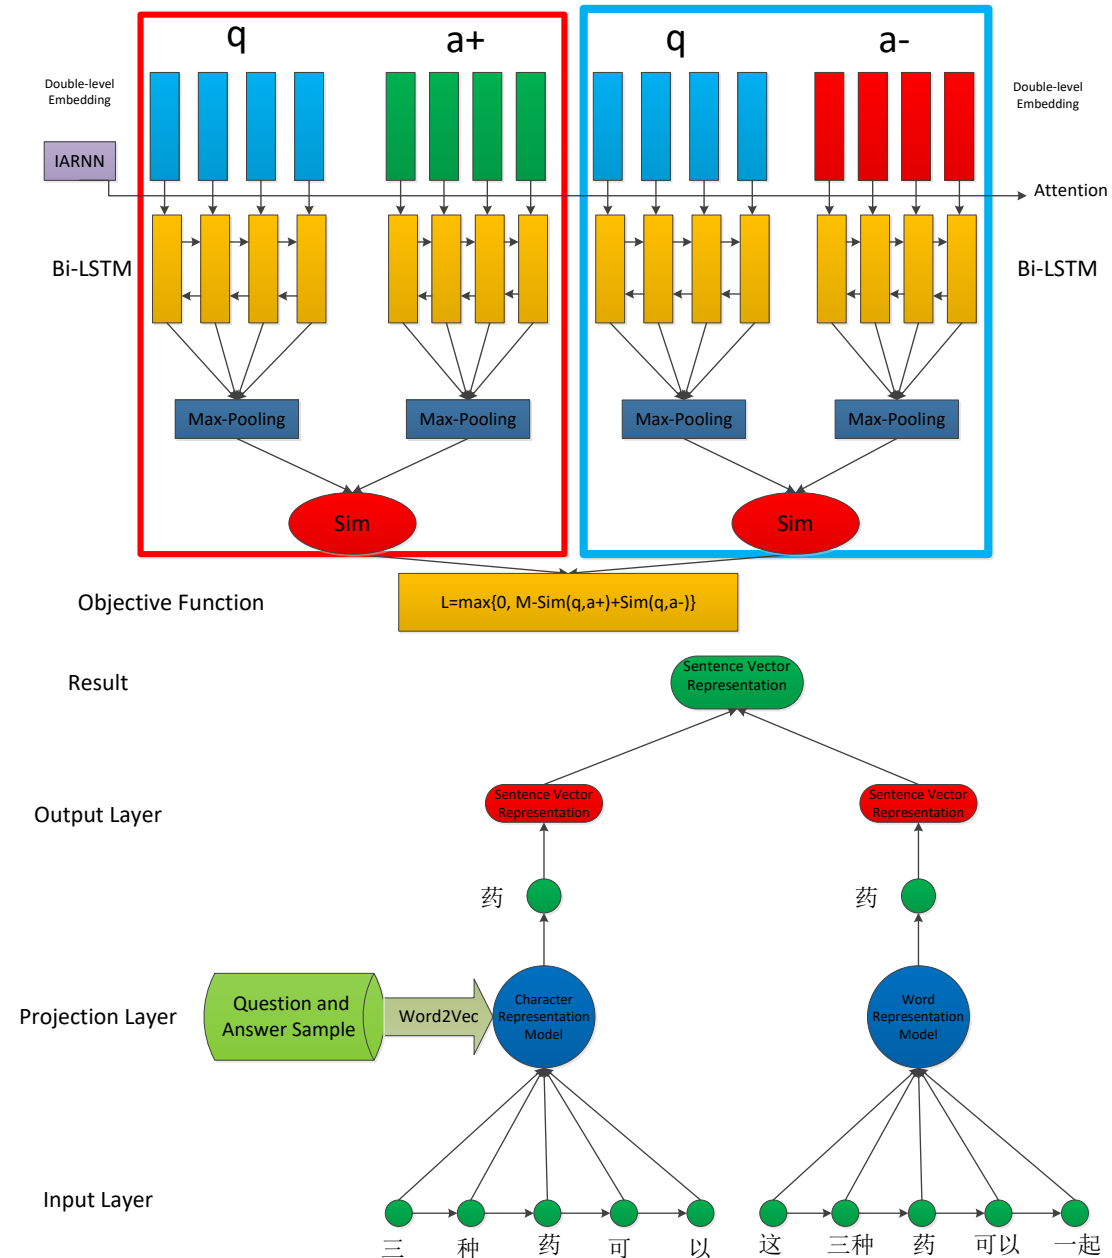

In this work, we solve Chinese word segmentation error by double-level embedding in sentence vector representation model, and solve the limitations of the traditional Q&A similarity calculation by using similarity calculation including semantic information. The proposed bidirectional LSTM framework based on the IARNN attention mechanism also successfully solves the problem of backward deviation of the traditional attention mechanism. The experimental results on real datasets exceed baseline accuracy by 14% and the accuracy of top-1 under Bi-LSTM can reach 79.15%, which has great potential for development and practical utility. Therefore, the research in this paper may have significant medical application impact.
